# Supplementary material for: Stochastic electrochemistry with electrocatalytic nanoparticles at inert ultramicroelectrodes—theory and experiments
Source: Royal Society of Chemistry journal article supplement (doi:10.1039/c0cp02543g), 2011-01-01
Supplement: c0cp02543g.pdf [file c0cp02543g.pdf]

## Electronic Supplementary Information

### Stochastic Electrochemistry with Electrocatalytic Nanoparticles at Inert Ultramicroelectrodes - Theory and Experiments

Seong Jung Kwon<sup>a</sup>, Hongjun Zhou<sup>a</sup>, Fu-Ren F. Fan<sup>a</sup>, Vasily Vorobyev<sup>a</sup>, Bo Zhang<sup>b</sup>, and Allen J. Bard<sup>a\*</sup>

<sup>a</sup>Center for Electrochemistry, Department of Chemistry and Biochemistry, The University of Texas at Austin, Austin, TX 78712, USA. Fax: 512-471-0088; Tel: 512-471-3761; E-mail: [ajbard@mail.utexas.edu](mailto:ajbard@mail.utexas.edu)

<sup>b</sup>Department of Chemistry, University of Washington, Seattle, WA 98195, USA. Tel: 206-543-1767; E-mail: [zhang@chem.washington.edu](mailto:zhang@chem.washington.edu)

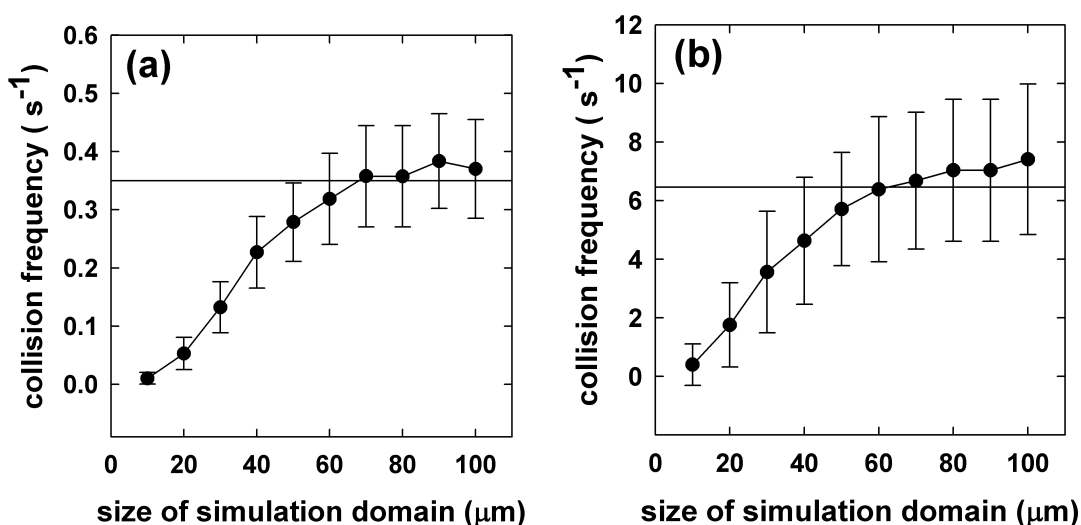

**Figure S1.** Simulated collision frequency as a function of the size of domain taken for (a) sticking and (b) blip collisions. Particle concentration, 1.6 pM; step period ( $\tau$ ), 1 ms; step length ( $\delta_x$ ), 0.19 μm (consistent with a NP diffusion coefficient,  $D$  of  $1.75 \times 10^{-7}$  cm<sup>2</sup>/s); radius of UME, 5 μm. Total simulation time was 50 s. The solid line is theoretical value calculated by eqns (a) (1) and (b) (9).

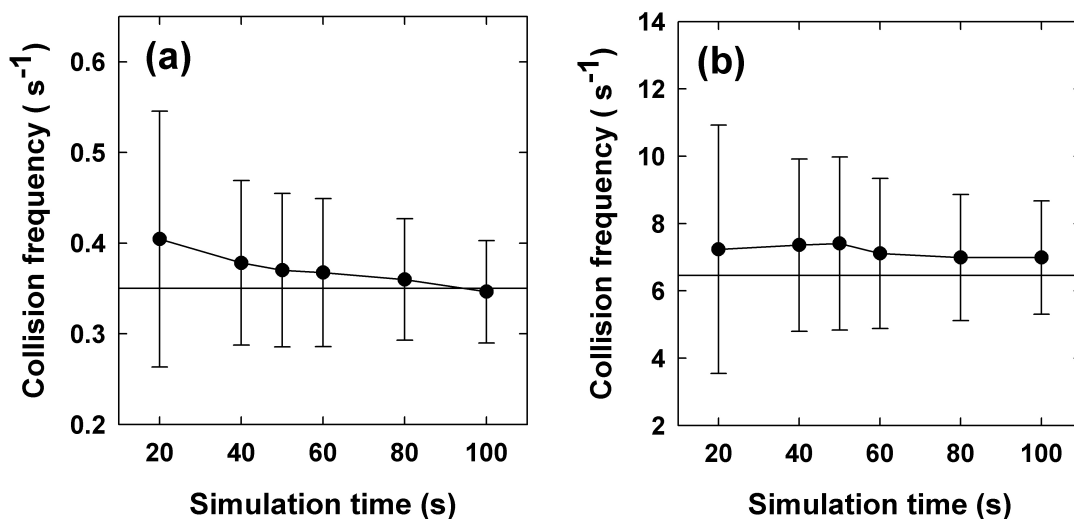

**Figure S2.** Simulated collision frequency at a various simulation times for (a) sticking and (b) blip collisions. The concentration of particle is 1.6 pM. Particle concentration, 1.6 pM; step period ( $\tau$ ), 1ms; step length ( $\delta_x$ ), 0.19  $\mu\text{m}$  (consistent with a NP diffusion coefficient,  $D$  of  $1.75 \times 10^{-7} \text{ cm}^2/\text{s}$ ); radius of UME, 5  $\mu\text{m}$ . The size of domain was 100  $\mu\text{m}$ . The solid line is theoretical value calculated by eqns (a) (1) and (b) (9).

| step period, $\tau$<br>(ms) | step length, $\delta_x$<br>( $\mu\text{m}$ ) | Concentration<br>of NP (pM) | radius of<br>electrode ( $\mu\text{m}$ ) | number of collision |           |
|-----------------------------|----------------------------------------------|-----------------------------|------------------------------------------|---------------------|-----------|
|                             |                                              |                             |                                          | Staircase (/s)      | Blip (/s) |
| 0.1                         | 0.059                                        | 1.6                         | 5                                        | 0.4038              | 22.9648   |
| 1                           | 0.19                                         | 1.6                         | 5                                        | 0.3702              | 7.4076    |
| 10                          | 0.59                                         | 1.6                         | 5                                        | 0.3646              | 2.4128    |
| 100                         | 1.9                                          | 1.6                         | 5                                        | 0.2982              | 0.7336    |
| 1                           | 0.19                                         | 0.16                        | 5                                        | 0.035               | 0.8052    |
| 1                           | 0.19                                         | 0.8                         | 5                                        | 0.195               | 3.4134    |
| 1                           | 0.19                                         | 3.2                         | 5                                        | 0.7594              | 14.7718   |
| 1                           | 0.19                                         | 16                          | 5                                        | 3.722               | 71.6312   |
| 1                           | 0.19                                         | 1.6                         | 1.25                                     | 0.0596              | 0.3088    |
| 1                           | 0.19                                         | 1.6                         | 2.5                                      | 0.1670              | 1.8554    |
| 1                           | 0.19                                         | 1.6                         | 10                                       | 0.8432              | 29.5298   |
| 1                           | 0.19                                         | 1.6                         | 15                                       | 1.405               | 65.4142   |

**Table S1.** Simulation results at various conditions. In all cases, diffusion coefficient,  $D$  is  $1.75 \times 10^{-7} \text{ cm}^2/\text{s}$ . The total simulation time and the size of domain are 50 s and 100  $\mu\text{m}$ .

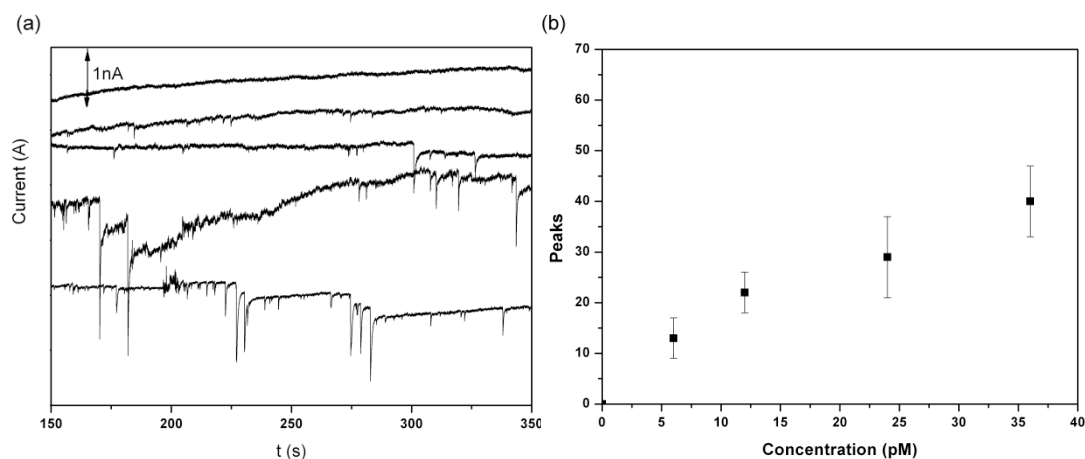

**Figure S3.** Au NP/PtO<sub>x</sub> UME/borohydride oxidation system. (a) The *i-t* curves on a pre-oxidized Pt UME (5 μm in radius) at 0 V in the presence of different concentrations of Au NPs, from top to bottom, 0, 6, 12, 24 and 36 pM. (b) Peaks in a time interval of 200 s at different NP concentrations; electrolyte, 10 mM NaBH<sub>4</sub>; 0.1 M NaOH.

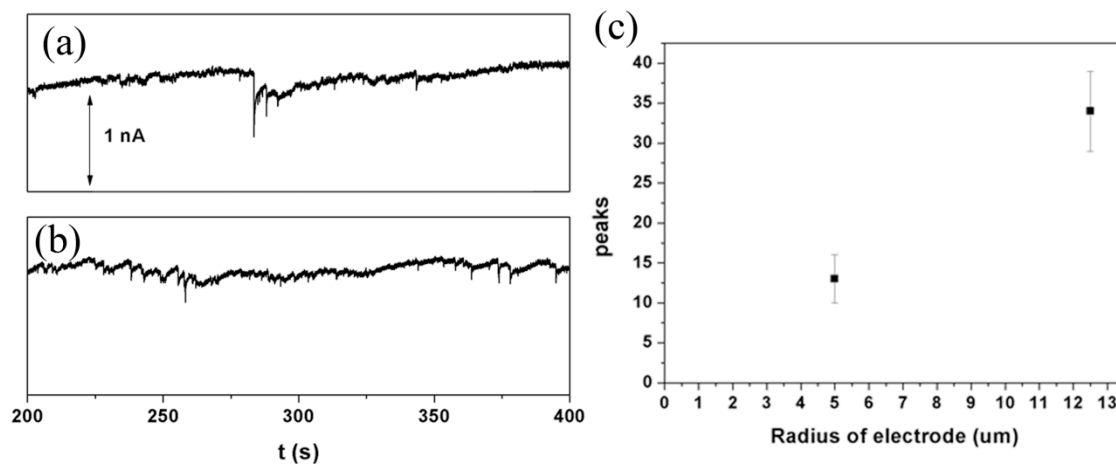

**Figure S4.** Au NP/PtO<sub>x</sub> UME/borohydride oxidation system. (a) and (b), *i-t* curves recorded on different sized pre-oxidized Pt UMEs (5 μm and 12.5 μm in radius) at 0 V in the presence of 6 pM Au NPs. (c) Peaks in the time interval of 200 s on different sized electrodes; electrolyte, 10 mM NaBH<sub>4</sub>; 0.1 M NaOH.
